# Supplementary material for: Choline kinase alpha impairment overcomes TRAIL resistance in ovarian cancer cells
Source: PubMed Central journal article supplement (PMC7780408; doi:10.1186/s13046-020-01794-6), 2021-01-04
Supplement: 13046_2020_1794_MOESM1_ESM.pdf [file 13046_2020_1794_MOESM1_ESM.pdf]

**SUPPLEMENTARY TABLE 1**

Full list of antibodies, probes and siRNA used

| <b>Antibodies for Western blotting</b>       |                 |                     |
|----------------------------------------------|-----------------|---------------------|
| <b>Target</b>                                | <b>Source</b>   | <b>Product code</b> |
| ChoK $\alpha$                                | Sigma-Aldrich   | HPA024153           |
| TRAIL-R2                                     | Sigma-Aldrich   | HPA023625           |
| $\beta$ -actin                               | Sigma-Aldrich   | A2066               |
| Vinculin                                     | Cell Signalling | 4650S               |
| PARP                                         | Cell Signalling | 46D11               |
| Caspase-3                                    | Cell Signalling | 9662                |
| Bcl-2                                        | Santa Cruz      | sc-509              |
| Bid                                          | Cell Signalling | 2002                |
| XIAP                                         | Santa Cruz      | sc-55550            |
| Cav-1                                        | Santa Cruz      | sc-894              |
| Flot-1                                       | Cell Signalling | 3253S               |
| Rabbit IgG-HRP                               | Sigma-Aldrich   | GENA934             |
| Mouse IgG-HRP                                | Sigma-Aldrich   | GENA931             |
| <b>Antibodies for flow cytometry</b>         |                 |                     |
| <b>Target</b>                                | <b>Source</b>   | <b>Product code</b> |
| TRAIL-R2                                     | R&D System      | FAB6311P            |
| TRAIL-R1                                     | R&D System      | FAB347P             |
| TRAIL-R3                                     | Sigma-Aldrich   | PRS2299             |
| TRAIL-R4                                     | Sigma-Aldrich   | PRS2021             |
| Mouse IgG1-PE                                | Miltenyi Biotec | 130-092-212         |
| Mouse IgG2a-PE                               | Miltenyi Biotec | 130-091-835         |
| Rabbit IgG-ALEXA 488                         | Thermo Fisher   | A11034              |
| Annexin V-FITC                               | Abcam           | ab14085             |
| <b>Probes for quantitative Real-Time PCR</b> |                 |                     |
| <b>Target</b>                                | <b>Source</b>   | <b>Product code</b> |
| CHKA                                         | Thermo Fisher   | HS00608045_m1       |
| CHKB                                         | Thermo Fisher   | HS01925200_s1       |
| TNFRSF10B                                    | Thermo Fisher   | HS00366278_m1       |
| TNFRSF10A                                    | Thermo Fisher   | HS00269492_m1       |
| TNFRSF10C                                    | Thermo Fisher   | HS00182570_m1       |
| TNFRSF10D                                    | Thermo Fisher   | HS00388742_m1       |
| RPL13A                                       | Thermo Fisher   | H201926559_g1       |
| GAPDH                                        | Thermo Fisher   | HS03929097_g1       |
| <b>small interfering RNA</b>                 |                 |                     |
| <b>Target</b>                                | <b>Source</b>   | <b>Product code</b> |
| CHKA NM_212469                               | Dharmacon       | siGENOME smart pool |
| CHKA NM_001277                               | Dharmacon       |                     |
| CHKB NM_001277                               | Dharmacon       |                     |
| non-targeting no.2                           | Dharmacon       |                     |
