# Supplementary material for: Choline kinase alpha impairment overcomes TRAIL resistance in ovarian cancer cells
Source: PubMed Central journal article supplement (PMC7780408; doi:10.1186/s13046-020-01794-6), 2021-01-04
Supplement: 13046_2020_1794_MOESM2_ESM.pdf [file 13046_2020_1794_MOESM2_ESM.pdf]

## SUPPLEMENTARY FIGURES

**A**

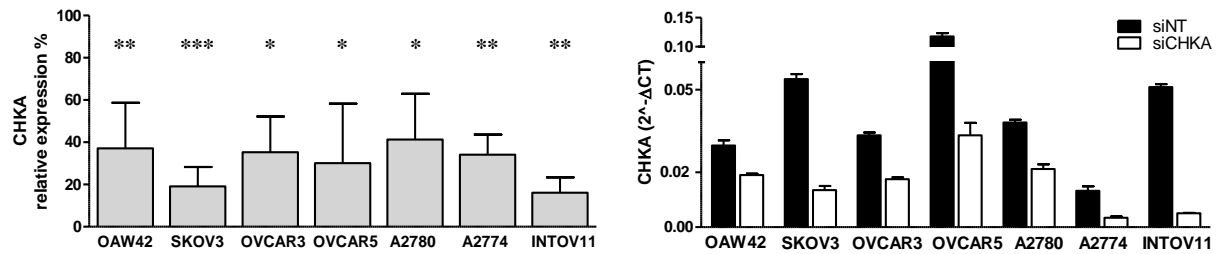

**B**

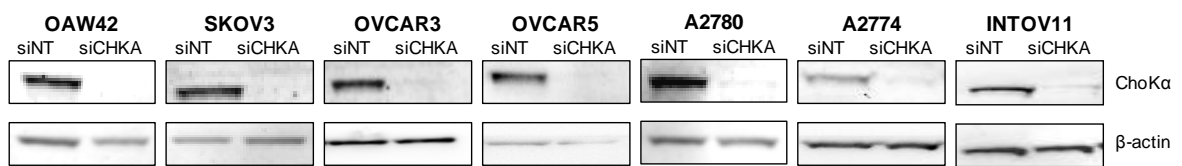

**Fig. S1 - Transient siCHKA efficiently reduced the relevant transcript and protein expression.**

**A.** Relative quantification of *CHKA* transcript expression reported as percentage of 2<sup>-ΔCT</sup> siCHKA/siNT ratio (*left panel*), asterisks are referred to statistically significant differences; a representative experiment is shown (*right panel*). **B.** Representative Western blotting analysis for ChoK $\alpha$  protein expression in OVC cell lines following 72 h transient *CHKA* silencing.  $\beta$ -actin was used as loading control.

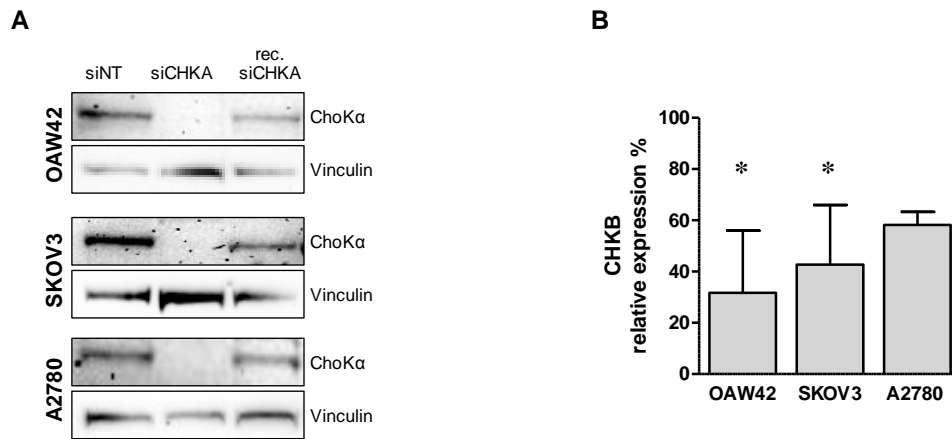

**Fig. S2 - OC cells' sensitivity to sTRAIL treatment is specifically dependent upon *CHKA* downmodulation.**

**A.** Representative Western blotting analysis for ChoK $\alpha$  protein expression in OC cell lines following *CHKA* transient silencing and recovery of ChoK $\alpha$  expression. Vinculin was used as loading control. **B.** Relative quantification of *CHKB* transcript expression reported as percentage of  $2^{-\Delta\Delta CT}$  siCHKB/siNT ratio, asterisks are referred to statistically significant differences.

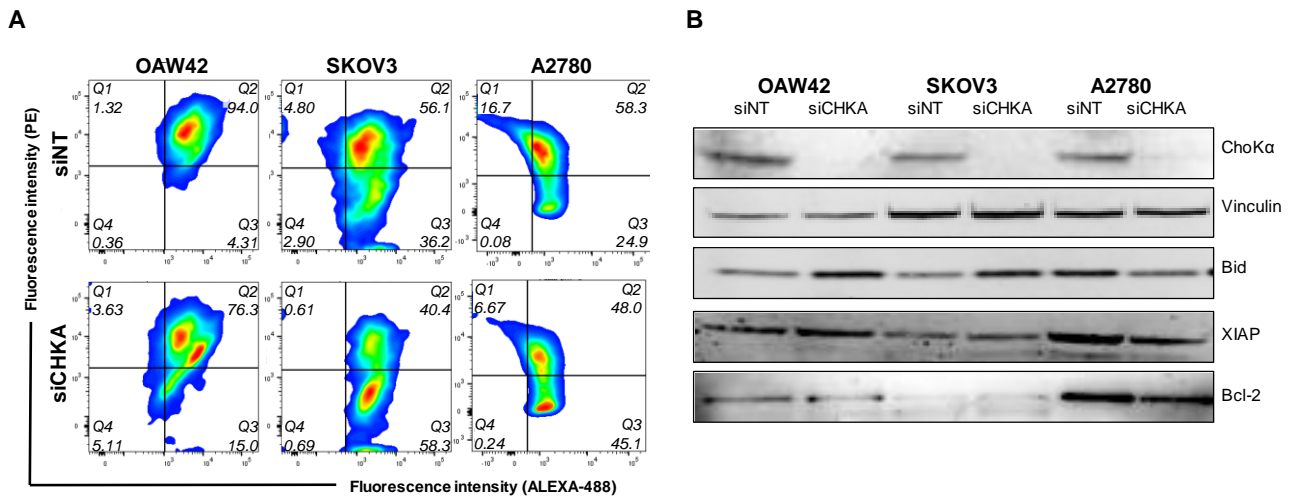

**Fig. S3 - *CHKA* silencing affected mitochondrial membrane potential but did not modify expression of common pro/anti apoptosis molecules.**

**A.** Representative flow cytometry analysis of mitochondrial membrane potential ( $\psi_m$ ) in siCHKA and siNT cell lines as detected by JC-1 labeling. A decrease in the red/green fluorescence intensity ratio indicates mitochondrial membrane depolarization (for each quadrant, the relative cell percentage on total count events is reported). **B.** Representative Western blotting analysis for Bid, XIAP and Bcl-2 protein expression in OC cell lines following transient *CHKA* silencing. Vinculin was used as loading control.

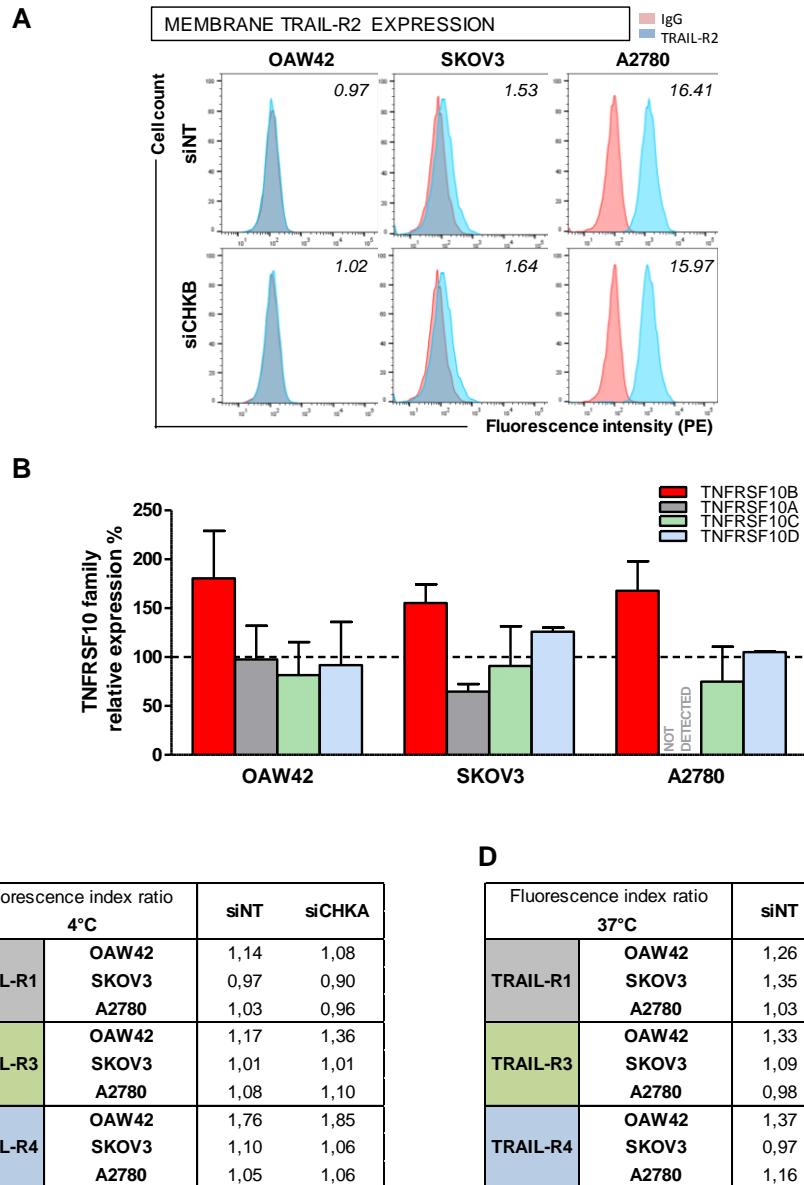

**Fig. S4 - TRAIL-R2 is the only TRAIL-Rs family member specifically affected by siCHKA.**

**A.** siCHKB does not affect TRAIL-R2 membrane expression as detected by flow cytometry analysis. Fluorescence index are reported **B.** *TNFRSF10A*, *TNFRSF10C*, *TNFRSF10D* did not significantly increase in siCHKA cells compared to control. Relative quantification of transcripts expression are reported as percentage of  $2^{-\Delta CT}$  siCHKA/siNT ratio. *TNFRSF10B* expression (red bar) already reported in Fig. 4 is shown for comparison. **C, D.** Representative fluorescence indexes detected by flow cytometry summarizing membrane surface expression of TRAIL-Rs in siCHKA and control OC cell lines detected following primary antibodies incubation at 4°C or 37°C, respectively.

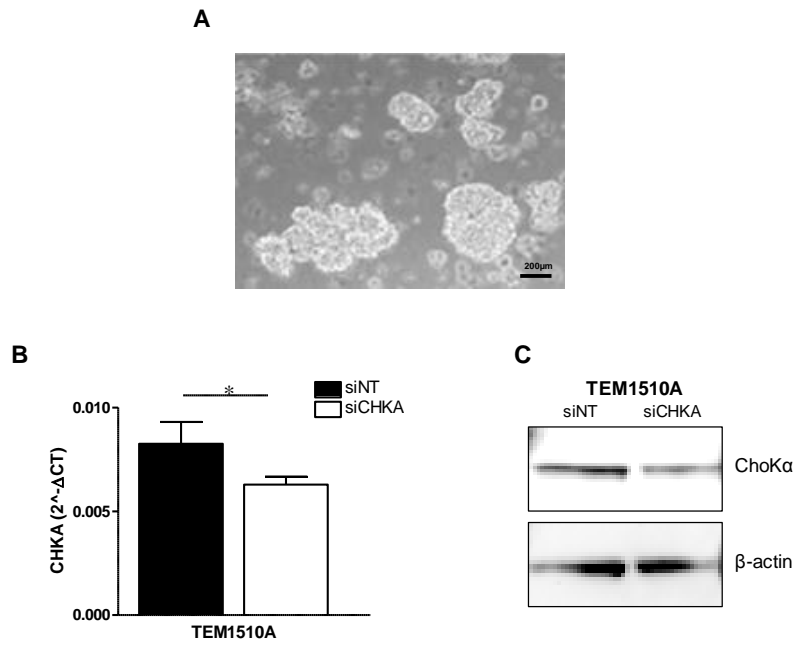

**Fig. S5 - Assessment of siCHKA efficacy on *ex vivo* OC cells collected from patients' ascites.**

**A.** Live 20× microscope image of typical appearance of *ex vivo* OC cells in patient's ascitic fluid.

**B.** Relative quantification of *CHKA* transcript expression in siCHKA OC cells derived from ascites (patient TEM1510), asterisks are referred to statistically significant differences.

**C.** Representative Western blotting analysis for ChoKα protein expression in *ex vivo* OC cells following transient *CHKA* silencing. β-actin was used as loading control.
